# Supplementary material for: Impacts of abiotic factors and pesticide on the development, phenology, and reproductive biology of pink bollworm, Pectinophora gossypiella (Saunders) (Lepidoptera: Gelechiidae)
Source: PeerJ. 2024 Nov 29;12:e18399. doi: 10.7717/peerj.18399 (PMC11610462; doi:10.7717/peerj.18399)
Supplement: Supplemental Information 2 [file peerj-12-18399-s002.xlsx]

## Sheet: Temperature
comparisons for adult longevity on different temperature level										Comparisons for egg-hatching on different temperature	egg-incubation period on different temperature
										Treatment	Mean	Homogenous
Temperature	Mean	Homogenous group								21˚C	8.1667	A
21˚C	9.33	B								23˚C	4.833	B
23˚C	10.167	B								27˚C	2.833	C
27˚C	14.833	A								30˚C	5.1667	B
30˚C	10	B								33˚˚C	4.1667	BC
33˚C	6.833	C
comparisons for fecundity on different temperature										Comparisons of egg-hatching on different temperature
Treatment	Mean	Homogenous group								Temperature	Mean	Homogenous group
21˚C	17.333	B								21˚C	20.367	E
23˚C	22	B								23˚C	30.927	D
27˚C	29.667	A								27˚C	63.667	A
30˚C	21.667	B								30˚C	51.32	B
33˚C	12	C								33˚C	45.25	C
comparison of larval period on different tenperature										comaprison of diapusing larvae on different temperature
Treatment	Mean	Homogenous group								Temperature	Mean	Homogenous group
21˚C	17.5	A								21˚C	43.517	A
23˚C	14.333	B								23˚C	28.993	B
27˚C	10.833	C								27˚C	11.517	E
30˚C	13.5	BC								30˚C	21.377	C
33˚C	14.167	B								33˚C	15.89	D
comparisons of larval weight on different temperature										comparisons of larval mortality on different temperature
Treatment	Mean	homogenous group								Temperature	Mean	Homogenous group
21˚C	19.2	A								21˚C	39.76	B
23˚C	16.26	B								23˚C	28.793	C
27˚C	9.633	E								27˚C	16.257	E
30˚C	11.677	D								30˚C	21.923	D
33˚C	14.737	C								33˚C	51.107	A
comparisons of pupal recovery on different temperature										comparisons of pupal periodon different tenperature
Treatment	Mean	Homogenous group								Treatment	Mean	Homogenous group
21˚C	20.917	E								21˚C	10	A
23˚C	30.657	D								23˚C	8.333	B
27˚C	82.703	A								27˚C	4.5	E
30˚C	52.26	B								30˚C	6.267	D
33˚C	39.563	C								33˚C	7.5	C
comparison of pupal weighton on different temeprature										Comparisons of pupal length on different temperature
Treatment	Mean	Homogenous group								treatment	Mean	Homogenous group
21˚C	11.56	CD								21˚C	3.73	C
23˚C	13.85	B								23˚C	4.2933	C
27˚C	17.44	A								27˚C	7.74	A
30˚C	12.567	BC								30˚C	6.2967	B
33˚C	10.507	D								33˚C	6.04	B
comaprisons of pupal mortality on different temperature										comparisons of adult mortality on different temperature
Treatment	Mean	Homogenous group								Treatment	Mean	Homogenous group
21˚C	45.443	B								21˚C	47.48	B
23˚C	29.377	C								23˚C	36.517	C
27˚C	17.307	E								27˚C	17.92	E
30˚C	23.587	D								30˚C	24.993	D
33˚C	59.037	A								33˚C	61.92	A
Comparison on adult mortality on different temperature
R: H %	Mean	Homogenous groups
40	9.333	BC
50	8.333	C
60	13.833	A
70	11	B
80	6.333	D

## Sheet: Relative humidity
comparison of means	means on Relative humidity			fecundity								comparison	of egg-incubation period on relative humidity
R: H %	Mean	Homogenous groups										R: H %	Mean	Homogenous groups
40	18.667	D										40	4.8333	B
50	21.667	C										50	3.5	BC
60	40.333	A										60	2	C
70	25	B										70	5.3333	B
80	13.333	E										80	9.1667	A
egg hatching period on relative humidity												Larval period on relative humidity
R: H %	Mean	Homogenous groups										R: H %	Mean	Homogenous groups
40	21.14	C										40	14.167	D
50	33.18	B										50	13.167	B
60	73.853	A										60	10.5	C
70	37.957	B										70	13.5	B
80	14.29	D										80	16.833	A
of relative humidity levels on life spanof pectinophora gossypiella adults			e span of									relative humidity levels on larval mortality
R: H %	Mean	Homogenous groups										R: H %	Mean	Homogenous groups
40	14.117	AB										40	60.22	B
50	11.21	C										50	50.35	C
60	6.58	D										60	17.48	E
70	12.773	BC										70	41.21	D
80	15.547	A										80	80.66	A
relative humidity levels onpupal recovery												relative humidity levels on pupal period
R: H %	Mean	Homogenous groups										R: H %	Mean	Homogenous groups
40	39.68	D										40	8.6667	A
50	47.88	C										50	7.1667	B
60	81.1	A										60	4.3333	C
70	67.78	B										70	6.5	D
80	31.65	E										80	9.6667	A
relative humidity levels on diapausing larvae												relative humidity levels on pupal weight
R: H %	Mean	Homogenous groups										R: H %	Mean	Homogenous groups
40	41.173	B										40	15.09	C
50	30.45	C										50	16.517	BC
60	10.443	E										60	18.513	A
70	22.293	D										70	17.223	AB
80	62.467	A										80	15.33	C
relative humidity levels on pupal length												relative humidity levels on pupal mortality
R: H %	Mean	Homogenous groups										R: H %	Mean	Homogenous groups
40	3.8167	C										40	58.997	B
50	5.1533	B										50	47.897	C
60	8	A										60	20.107	E
70	5.58	B										70	38.063	D
80	2.8867	C										80	75.033	A
relative humidity levels on adult mortality												Lambda-cyhalothrinon adult longevity
R: H %	Mean	Homogenous groups										Lambda Conc. (ppm)	Mean	Homogenous groups
40	63.097	A										0.5	17.333	A
50	47.397	C										1	14.5	B
60	21.443	E										1.5	10.5	C
70	35.177	D										2	7	D
80	55.517	B										2.5	2.333	E

## Sheet: insectsides
Lambda-cyhalothrin on fecundity		fecundity										Lambda-cyhalothrin on incubation period
Lambda Conc. (ppm)	Mean	Homogenous groups										Lambda Conc. (ppm)	Mean	Homogenous groups
0.5	24	A										0.5	4.83	C
1	19.333	B										1	6	BC
1.5	13	C										1.5	6	BC
2	9.333	D										2	7.5	B
2.5	5	E										2.5	9.5	A
Lambda-cyhalothrinon hatching percentage												Lambda-cyhalothrin on larval period
Lambda Conc. (ppm)	Mean	Homogenous groups										Lambda Conc. (ppm)	Mean	Homogenous groups
0.5	68.963	A										0.5	11.5	D
1	37.957	B										1	13.5	C
1.5	30.663	C										1.5	13.333	C
2	21.5	D										2	14.833	B
2.5	11.3	E										2.5	16.333	A
Lambda-cyhalothrin on larval weight												Lambda-cyhalothrin on larval mortality
Lambda Conc. (ppm)	Mean	Homogenous groups										Lambda Conc. (ppm)	Mean	Homogenous groups
0.5	8.053	D										0.5	17.487	E
1	10.697	C										1	40.513	D
1.5	11.41	BC										1.5	49.227	C
2	12.383	B										2	63.817	B
2.5	17.043	A										2.5	80.217	A
Lambda-cyhalothrin on pupal recovery												Lambda-cyhalothrin on pupal period
Lambda Conc. (ppm)	Mean	Homogenous groups										Lambda Conc. (ppm)	Mean	Homogenous groups
0.5	80.733	A										0.5	4.5	E
1	52.847	B										1	6.5	D
1.5	41.923	C										1.5	8	C
2	31.653	D										2	9.833	B
2.5	24.077	E										2.5	12	A
Lambda-cyhalothrin on larval diapausing												Lambda-cyhalothrin on pupal weight
Lambda Conc. (ppm)	Mean	Homogenous groups										Lambda Conc. (ppm)	Mean	Homogenous groups
0.5	9.03	E										0.5	15.627	A
1	16.737	D										1	13.213	B
1.5	24.747	C										1.5	9.487	C
2	35.45	B										2	7.93	CD
2.5	54.223	A										2.5	6.907	D
Lambda-cyhalothrin on pupal length												Lambda-cyhalothrin on pupal mortality
Lambda Conc. (ppm)	Mean	Homogenous groups										Lambda Conc. (ppm)	Mean	Homogenous groups
0.5	6.8533	A										0.5	16.487	E
1	5.33	B										1	24.71	D
1.5	4.48	BC										1.5	44.86	C
2	3.7767	CD										2	50.633	B
2.5	3.0433	D										2.5	64.627	A
Lambda-cyhalothrin on adult mortality														ADULT LONGETIVITY
Lambda Conc. (ppm)	Mean	Homogenous groups										Lambda Conc. (ppm)	Mean	Homogenous groups
0.5	16.777	E										0.5	17.333	A
1	29.63	D										1	14.5	B
1.5	45.553	C										1.5	10.5	C
2	59.623	B										2	7	D
2.5	70.74	A										2.5	2.333	E

## Sheet: photoperiod
phot operiod on adult longevity													levels of photoperiod on fecundity
Photoperiod (L: D)	Mean	Homogenous group											Photoperiod (L: D)	Mean	Homogenous group
12:12:00	9.833	D											12:12:00	15	D
13:11:00	12.5	C											13:11:00	20	C
14:10:00	16.5	A											14:10:00	28	A
15:09:00	14.5	B											15:09:00	22	B
16:08:00	7.833	E											16:08:00	12.667	E
photoperiod on incubation period													photoperiod on hatching% of eggs
Photoperiod (L: D)	Mean	Homogenous group											Photoperiod (L: D)	Mean	Homogenous group
12:12:00	6.8333	A											12:12:00	19.3	D
13:11:00	4.6667	B											13:11:00	31.04	C
14:10:00	2.3333	C											14:10:00	62.623	A
15:09:00	4.6667	B											15:09:00	45.4	B
16:08:00	4.8333	B											16:08:00	35.223	C
photoperiod on larval period													photoperiod on diapausing larvae (%)
Photoperiod (L: D)	Mean	Homogenous group											Photoperiod (L: D)	Mean	Homogenous group
12:12:00	14.833	A											12:12:00	29.363	A
13:11:00	13.5	C											13:11:00	21.323	B
14:10:00	10.833	B											14:10:00	9.22	E
15:09:00	15	E											15:09:00	13.957	D
16:08:00	14.5	D											16:08:00	17.993	C
photoperiod on larval weight													photoperiod on larval mortality
Photoperiod (L: D)	Mean	Homogenous group											Photoperiod (L: D)	Mean	Homogenous group
12:12:00	19.573	A											12:12:00	29.22	B
13:11:00	16.63	B											13:11:00	24.29	C
14:10:00	10.063	E											14:10:00	17.773	E
15:09:00	13.48	D											15:09:00	21.18	D
16:08:00	15.07	C											16:08:00	38.84	A
photoperiod on pupal recovery													photoperiod on pupal period
Photoperiod (L: D)	Mean	Homogenous group											Photoperiod (L: D)	Mean	Homogenous group
12:12:00	29.37	D											12:12:00	8.6667	A
13:11:00	39.073	C											13:11:00	6.3333	B
14:10:00	75.263	A											14:10:00	4.8333	C
15:09:00	51.927	B											15:09:00	6.3333	B
16:08:00	42.473	C											16:08:00	7.8333	A
photoperiod on pupal weight													photoperiod on pupal length
Photoperiod (L: D)	Mean	Homogenous group											Photoperiod (L: D)	Mean	Homogenous group
12:12:00	12.257	C											12:12:00	3.8467	C
13:11:00	13.743	B											13:11:00	5.85	B
14:10:00	18.067	A											14:10:00	8.4133	A
15:09:00	12.627	BC											15:09:00	5.6867	D
16:08:00	9.843	D											16:08:00	5.5133	D
photoperiod on pupal mortality													photoperiod on adult mortality
Photoperiod (L: D)	Mean	Homogenous group											Photoperiod (L: D)	Mean	Homogenous group
12:12:00	37.073	B											12:12:00	40.023	B
13:11:00	28.787	C											13:11:00	35.697	C
14:10:00	17.743	E											14:10:00	19.253	E
15:09:00	22.63	D											15:09:00	29.303	D
16:08:00	47.36	A											16:08:00	48.84	A
