# Supplementary material for: Impacts of abiotic factors and pesticide on the development, phenology, and reproductive biology of pink bollworm, Pectinophora gossypiella (Saunders) (Lepidoptera: Gelechiidae)
Source: PeerJ. 2024 Nov 29;12:e18399. doi: 10.7717/peerj.18399 (PMC11610462; doi:10.7717/peerj.18399)
Supplement: Supplemental Information 3 [file peerj-12-18399-s003.xlsx]

## Sheet: Temperature
comparisons for adult longevity on different temperature level													comparisons of adult mortality on different temperature
									comparisons of adult mortality on different temperature					Mean	Homogenous group
Temperature	Mean	Homogenous group											21˚C	47.48	B
21˚C	9.33	B											23˚C	36.517	C
23˚C	10.167	B											27˚C	17.92	E
27˚C	14.833	A											30˚C	24.993	D
30˚C	10	B											33˚C	61.92	A
33˚C	6.833	C
comparisons for fecundity on different temperature
Treatment	Mean	Homogenous group
21˚C	17.333	B
23˚C	22	B
27˚C	29.667	A
30˚C	21.667	B
33˚C	12	C
Comparisons of egg-hatching on different temperature
Temperature	Mean	Homogenous group
21˚C	20.367	E
23˚C	30.927	D
27˚C	63.667	A
30˚C	51.32	B
Comparisons for egg-hatching on different temperature	egg-incubation period on different temperature
Treatment	Mean	Homogenous
21˚C	8.1667	A
23˚C	4.833	B
27˚C	2.833	C
30˚C	5.1667	B
33˚˚C	4.1667	BC
													comparison of larval period on different tenperature
													Treatment	Mean	Homogenous group
													21˚C	17.5	A
													23˚C	14.333	B
													27˚C	10.833	C
													30˚C	13.5	BC
													33˚C	14.167	B
comaprison of diapusing larvae on different temperature													comparisons of larval weight on different temperature
Temperature	Mean	Homogenous group											Treatment	Mean	homogenous group
21˚C	43.517	A											21˚C	19.2	A
23˚C	28.993	B											23˚C	16.26	B
27˚C	11.517	E											27˚C	9.633	E
30˚C	21.377	C											30˚C	11.677	D
33˚C	15.89	D											33˚C	14.737	C
comparisons of larval mortality on different temperature
Temperature	Mean	Homogenous group
21˚C	39.76	B
23˚C	28.793	C
27˚C	16.257	E
30˚C	21.923	D
33˚C	51.107	A
comparisons of pupal recovery on different temperature
Treatment	Mean	Homogenous group											comparisons of pupal periodon different tenperature
21˚C	20.917	E											Treatment	Mean	Homogenous group
23˚C	30.657	D											21˚C	10	A
27˚C	82.703	A											23˚C	8.333	B
30˚C	52.26	B											27˚C	4.5	E
33˚C	39.563	C											30˚C	6.267	D
													33˚C	7.5	C
													Comparisons of pupal length on different temperature
													treatment	Mean	Homogenous group
comparison of pupal weighton on different temeprature													21˚C	3.73	C
Treatment	Mean	Homogenous group											23˚C	4.2933	C
21˚C	11.56	CD											27˚C	7.74	A
23˚C	13.85	B											30˚C	6.2967	B
27˚C	17.44	A											33˚C	6.04	B
30˚C	12.567	BC
33˚C	10.507	D
comaprisons of pupal mortality on different temperature													Comparison on adult mortality on different temperature			RH
Treatment	Mean	Homogenous group
21˚C	45.443	B											R: H %	Mean	Homogenous groups
23˚C	29.377	C											40	9.333	BC
27˚C	17.307	E											50	8.333	C
30˚C	23.587	D											60	13.833	A
33˚C	59.037	A											70	11	B
													80	6.333	D

## Sheet: TEMP-anum
comparisons for fecundity on different temperature										comaprison of diapusing larvae on different temperature
Treatment	Mean	Homogenous group								Temperature	Mean	Homogenous group								comparisons of pupal recovery on different temperature												comparisons for adult longevity on different temperature level
21˚C	17.333									21˚C	43.517	A								Treatment	Mean	Homogenous group
23˚C	22	B								23˚C	28.993	B								21˚C	20.917	E										Temperature	Mean	Homogenous group
27˚C	29.667	A								27˚C	11.517	E								23˚C	30.657	D										21˚C	9.33	B
30˚C	21.667	B								30˚C	21.377	C								27˚C	82.703	A										23˚C	10.167	B
33˚C	12	C								33˚C	15.89	D								30˚C	52.26	B										27˚C	14.833	A
																				33˚C	39.563	C										30˚C	10	B
																																33˚C	6.833	C
																				comparisons of pupal periodon different tenperature
																				Treatment	Mean	Homogenous group
										comparisons of larval weight on different temperature										21˚C	10	A
Comparisons of egg-hatching on different temperature										Treatment	Mean	homogenous group								23˚C	8.333	B										comparisons of adult mortality on different temperature
Temperature	Mean	Homogenous group								21˚C	19.2	A								27˚C	4.5	E											Mean	Homogenous group
21˚C	20.367	E								23˚C	16.26	B								30˚C	6.267	D										21˚C	47.48	B
23˚C	30.927	D								27˚C	9.633	E								33˚C	7.5	C										23˚C	36.517	C
27˚C	63.667	A								30˚C	11.677	D																				27˚C	17.92	E
30˚C	51.32	B								33˚C	14.737	C																				30˚C	24.993	D
33˚C	45.25																															33˚C	61.92	A
																				comparison of pupal weighton on different temeprature
																				Treatment	Mean	Homogenous group
										comparison of larval period on different tenperature										21˚C	11.56	CD
Comparisons for egg-hatching on different temperature	egg-incubation period on different temperature									Treatment	Mean	Homogenous group								23˚C	13.85	B
Treatment	Mean	Homogenous								21˚C	17.5	A								27˚C	17.44	A
21˚C	8.1667	A								23˚C	14.333	B								30˚C	12.567	BC
23˚C	4.833	B								27˚C	10.833	C								33˚C	10.507	D
27˚C	2.833	C								30˚C	13.5	BC
30˚C	5.1667	B								33˚C	14.167	B
33˚˚C	4.1667	BC
																				comaprisons of pupal mortality on different temperature
																				Treatment	Mean	Homogenous group
										comparisons of larval mortality on different temperature										21˚C	45.443	B
										Temperature	Mean	Homogenous group								23˚C	29.377	C
										21˚C	39.76	B								27˚C	17.307	E
										23˚C	28.793	C								30˚C	23.587	D
										27˚C	16.257	E								33˚C	59.037	A
										30˚C	21.923	D
										33˚C	51.107	A
																				Comparisons of pupal length on different temperature
																				treatment	Mean	Homogenous group
																				21˚C	3.73	C
																				23˚C	4.2933	C
																				27˚C	7.74	A
																				30˚C	6.2967	B
																				33˚C	6.04	B
													Comparison on adult mortality on different temperature			RH
													R: H %	Mean	Homogenous groups
													40	9.333	BC
													50	8.333	C
													60	13.833	A
													70	11	B
													80	6.333	D

## Sheet: Temp-paper
			A						B						C						D

## Sheet: Relative humidity
relative humiidity levels on fecundity										relative humidity levels on diapausing larvae										relative humidity levels on pupal recovery												relative humidity levels on pupal recovery
R: H%	Mean	Homogenous group								R: H %	Mean	Homogenous groups								R: H %	Mean	Homogenous groups										R: H %	Mean	Homogenous groups
40	18.667	D								40	41.173	B								40	39.68	D										40	9.333	BC
50	21.667	C								50	30.45	C								50	47.88	C										50	8.333	C
60	40.333	A								60	10.443	E								60	81.1	A										60	13.833	A
70	25	B								70	22.293	D								70	67.78	B										70	11	B
80	13.333	E								80	62.467	A								80	31.65	E										80	6.333	D
																																relative humidity levels on adult mortality
egg hatching period on relative humidity										relative humidity levels on larval weight										relative humidity levels on pupal period
R: H %	Mean	Homogenous groups								R: H %	Mean	Homogenous groups																				R: H %	Mean	Homogenous groups
40	21.14	C								40	14.117	AB								R: H %	Mean	Homogenous groups										40	63.097	A
50	33.18	B								50	11.21	C								40	8.6667	A										50	47.397	C
60	73.853	A								60	6.58	D								50	7.1667	B										60	21.443	E
70	37.957	B								70	12.773	BC								60	4.3333	C										70	35.177	D
80	14.29	D								80	15.547	A								70	6.5	D										80	55.517	B
																				80	9.6667	A
comparison	Egg-incubation period on relative humidity									Relative humidity and Larval period										relative humidity levels on pupal weight
R: H %	Mean	Homogenous groups								R: H %	Mean	Homogenous groups								R: H %	Mean	Homogenous groups
40	4.8333	B								40	14.167	D								40	15.09	C
50	3.5	BC								50	13.167	B								50	16.517	BC
60	2	C								60	10.5	C								60	18.513	A
70	5.3333	B								70	13.5	B								70	17.223	AB
80	9.1667	A								80	16.833	A								80	15.33	C
																				relative humidity levels on pupal mortality
										Relative humidity and Larval period
										R: H %	Mean	Homogenous groups								R: H %	Mean	Homogenous groups
										40	60.22	B								40	58.997	B
										50	50.35	C								50	47.897	C
										60	17.48	E								60	20.107	E
										70	41.21	D								70	38.063	D
										80	80.66	A								80	75.033	A
																				relative humidity levels on pupal length
																				R: H %	Mean	Homogenous groups
																				40	3.8167	C
																				50	5.1533	B
																				60	8	A
																				70	5.58	B
																				80	2.8867	C

## Sheet: RH-Paper
	A						B							C							D

## Sheet: photoperiod
phot operiod on adult longevity													levels of photoperiod on fecundity
Photoperiod (L: D)	Mean	Homogenous group											Photoperiod (L: D)	Mean	Homogenous group
12:12:00	9.833	D											12:12:00	15	D
13:11:00	12.5	C											13:11:00	20	C
14:10:00	16.5	A											14:10:00	28	A
15:09:00	14.5	B											15:09:00	22	B
16:08:00	7.833	E											16:08:00	12.667	E
													80	6.333	D
photoperiod on incubation period													photoperiod on hatching% of eggs
Photoperiod (L: D)	Mean	Homogenous group											Photoperiod (L: D)	Mean	Homogenous group
12:12:00	6.8333	A											12:12:00	19.3	D
13:11:00	4.6667	B											13:11:00	31.04	C
14:10:00	2.3333	C											14:10:00	62.623	A
15:09:00	4.6667	B											15:09:00	45.4	B
16:08:00	4.8333	B											16:08:00	35.223	C
photoperiod on larval period													photoperiod on diapausing larvae (%)
Photoperiod (L: D)	Mean	Homogenous group											Photoperiod (L: D)	Mean	Homogenous group
12:12:00	14.833	A											12:12:00	29.363	A
13:11:00	13.5	C											13:11:00	21.323	B
14:10:00	10.833	B											14:10:00	9.22	E
15:09:00	15	E											15:09:00	13.957	D
16:08:00	14.5	D											16:08:00	17.993	C
													photoperiod on larval mortality
photoperiod on larval weight
Photoperiod (L: D)	Mean	Homogenous group											Photoperiod (L: D)	Mean	Homogenous group
12:12:00	19.573	A											12:12:00	29.22	B
13:11:00	16.63	B											13:11:00	24.29	C
14:10:00	10.063	E											14:10:00	17.773	E
15:09:00	13.48	D											15:09:00	21.18	D
16:08:00	15.07	C											16:08:00	38.84	A
photoperiod on pupal recovery													photoperiod on pupal period
Photoperiod (L: D)	Mean	Homogenous group											Photoperiod (L: D)	Mean	Homogenous group
12:12:00	29.37	D											12:12:00	8.6667	A
13:11:00	39.073	C											13:11:00	6.3333	B
14:10:00	75.263	A											14:10:00	4.8333	C
15:09:00	51.927	B											15:09:00	6.3333	B
16:08:00	42.473	C											16:08:00	7.8333	A
photoperiod on pupal weight													photoperiod on pupal length
Photoperiod (L: D)	Mean	Homogenous group											Photoperiod (L: D)	Mean	Homogenous group
12:12:00	12.257	C											12:12:00	3.8467	C
13:11:00	13.743	B											13:11:00	5.85	B
14:10:00	18.067	A											14:10:00	8.4133	A
15:09:00	12.627	BC											15:09:00	5.6867	D
16:08:00	9.843	D											16:08:00	5.5133	D
photoperiod on pupal mortality													photoperiod on pupal length	on adult	mortality
Photoperiod (L: D)	Mean	Homogenous group											Photoperiod (L: D)	Mean	Homogenous group
12:12:00	37.073	B											12:12:00	40.023	B
13:11:00	28.787	C											13:11:00	35.697	C
14:10:00	17.743	E											14:10:00	19.253	E
15:09:00	22.63	D											15:09:00	29.303	D
16:08:00	47.36	A											16:08:00	48.84	A

## Sheet: Ph Safa
levels of photoperiod on fecundity															photoperiod on diapausing larvae (%)
Photoperiod (L: D)	Mean	Homogenous group													Photoperiod (L: D)	Mean	Homogenous group
12:12:00	15	D													12:12:00	29.363	A
13:11:00	20	C													13:11:00	21.323	B
14:10:00	28	A													14:10:00	9.22	E
15:09:00	22	B													15:09:00	13.957	D
16:08:00	12.667	E													16:08:00	17.993	C
80	6.333	D
photoperiod on hatching% of eggs
															photoperiod on larval weight
Photoperiod (L: D)	Mean	Homogenous group													Photoperiod (L: D)	Mean	Homogenous group
12:12:00	19.3	D													12:12:00	19.573	A
13:11:00	31.04	C													13:11:00	16.63	B
14:10:00	62.623	A													14:10:00	10.063	E
15:09:00	45.4	B													15:09:00	13.48	D
16:08:00	35.223	C													16:08:00	15.07	C
photoperiod on incubation period
															photoperiod on larval period
Photoperiod (L: D)	Mean	Homogenous group
12:12:00	6.8333	A													Photoperiod (L: D)	Mean	Homogenous group
13:11:00	4.6667	B													12:12:00	14.833	A
14:10:00	2.3333	C													13:11:00	13.5	C
15:09:00	4.6667	B													14:10:00	10.833	B
16:08:00	4.8333	B													15:09:00	15	E
															16:08:00	14.5	D
															photoperiod on larval mortality
															Photoperiod (L: D)	Mean	Homogenous group
															12:12:00	29.22	B
															13:11:00	24.29	C
															14:10:00	17.773	E
															15:09:00	21.18	D
															16:08:00	38.84	A
photoperiod on pupal recovery
															phot operiod on adult longevity
Photoperiod (L: D)	Mean	Homogenous group
12:12:00	29.37	D													Photoperiod (L: D)	Mean	Homogenous group
13:11:00	39.073	C													12:12:00	9.833	D
14:10:00	75.263	A													13:11:00	12.5	C
15:09:00	51.927	B													14:10:00	16.5	A
16:08:00	42.473	C													15:09:00	14.5	B
															16:08:00	7.833	E
photoperiod on pupal period															photoperiod on pupal length	on adult	mortality
Photoperiod (L: D)	Mean	Homogenous group													Photoperiod (L: D)	Mean	Homogenous group
12:12:00	8.6667	A													12:12:00	40.023	B
13:11:00	6.3333	B													13:11:00	35.697	C
14:10:00	4.8333	C													14:10:00	19.253	E
15:09:00	6.3333	B													15:09:00	29.303	D
16:08:00	7.8333	A													16:08:00	48.84	A
photoperiod on pupal weight
Photoperiod (L: D)	Mean	Homogenous group
12:12:00	12.257	C
13:11:00	13.743	B
14:10:00	18.067	A
15:09:00	12.627	BC
16:08:00	9.843	D
photoperiod on pupal mortality
Photoperiod (L: D)	Mean	Homogenous group
12:12:00	37.073	B
13:11:00	28.787	C
14:10:00	17.743	E
15:09:00	22.63	D
16:08:00	47.36	A
photoperiod on pupal length
Photoperiod (L: D)	Mean	Homogenous group
12:12:00	3.8467	C
13:11:00	5.85	B
14:10:00	8.4133	A
15:09:00	5.6867	D
16:08:00	5.5133	D

## Sheet: PHP-paper
	A							B							C							D

## Sheet: Insecticides
Lambda-cyhalothrin on fecundity		fecundity									Lambda-cyhalothrin on larval diapausing										Lambda-cyhalothrin on pupal recovery										Lambda-cyhalothrinon adult longevity
Lambda Conc. (ppm)	Mean	Homogenous groups									Lambda Conc. (ppm)	Mean	Homogenous groups								Lambda Conc. (ppm)	Mean	Homogenous groups								Lambda Conc. (ppm)	Mean	Homogenous groups
0.5	24	A									0.5	9.03	E								0.5	80.733	A								0.5	17.333	A
1	19.333	B									1	16.737	D								1	52.847	B								1	14.5	B
1.5	13	C									1.5	24.747	C								1.5	41.923	C								1.5	10.5	C
2	9.333	D									2	35.45	B								2	31.653	D								2	7	D
2.5	5	E									2.5	54.223	A								2.5	24.077	E								2.5	2.333	E
Lambda-cyhalothrinon hatching percentage											Lambda-cyhalothrin on larval weight										Lambda-cyhalothrin on pupal period										Lambda-cyhalothrin on adult mortality
Lambda Conc. (ppm)	Mean	Homogenous groups									Lambda Conc. (ppm)	Mean	Homogenous groups								Lambda Conc. (ppm)	Mean	Homogenous groups								Lambda Conc. (ppm)	Mean	Homogenous groups
0.5	68.963	A									0.5	8.053	D								0.5	4.5	E								0.5	16.777	E
1	37.957	B									1	10.697	C								1	6.5	D								1	29.63	D
1.5	30.663	C									1.5	11.41	BC								1.5	8	C								1.5	45.553	C
2	21.5	D									2	12.383	B								2	9.833	B								2	59.623	B
2.5	11.3	E									2.5	17.043	A								2.5	12	A								2.5	70.74	A
											Lambda-cyhalothrin on larval period										Lambda-cyhalothrin on pupal mortality
Lambda-cyhalothrin on incubation period											Lambda Conc. (ppm)	Mean	Homogenous groups								Lambda Conc. (ppm)	Mean	Homogenous groups
Lambda Conc. (ppm)	Mean	Homogenous groups									0.5	11.5	D								0.5	16.487	E
0.5	4.83	C									1	13.5	C								1	24.71	D
1	6	BC									1.5	13.333	C								1.5	44.86	C
1.5	6	BC									2	14.833	B								2	50.633	B
2	7.5	B									2.5	16.333	A								2.5	64.627	A
2.5	9.5	A
																					Lambda-cyhalothrin on pupal weight
											Lambda-cyhalothrin on larval mortality
																					Lambda Conc. (ppm)	Mean	Homogenous groups
											Lambda Conc. (ppm)	Mean	Homogenous groups								0.5	15.627	A
											0.5	17.487	E								1	13.213	B
											1	40.513	D								1.5	9.487	C
											1.5	49.227	C								2	7.93	CD
											2	63.817	B								2.5	6.907	D
											2.5	80.217	A
																					Lambda-cyhalothrin on pupal length
																					Lambda Conc. (ppm)	Mean	Homogenous groups
																					0.5	6.8533	A
																					1	5.33	B
																					1.5	4.48	BC
																					2	3.7767	CD
																					2.5	3.0433	D

## Sheet: Insec-abid
			A							B							C							D
